# Supplementary material for: Essential roles of zebrafish bmp2a, fgf10, and fgf24 in the specification of the ventral pancreas
Source: PubMed Central journal article supplement — Mol Biol Cell. 2012 Mar 1;23(5):945–54. doi: 10.1091/mbc.E11-08-0664 (PMC3290651; doi:10.1091/mbc.e11-08-0664), 2012-03-01
Supplement: supp_E11-08-0664_CombinedSupMats.pdf [file supp_E11-08-0664_CombinedSupMats.pdf]

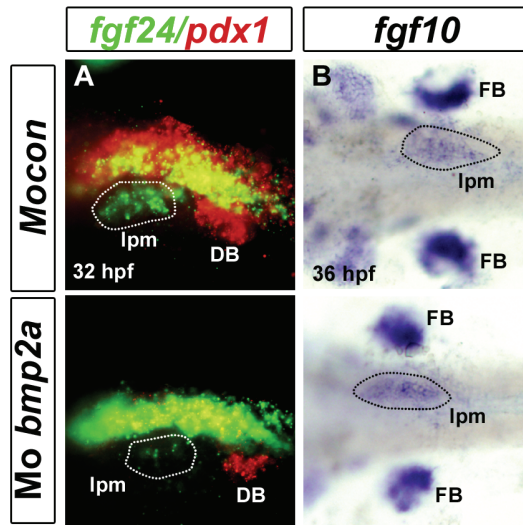

### Supplemental data 1

Knockdown of *bmp2a* represses the expression of *fgf24* in the lateral plate mesoderm.

(A) Ventral view of *fgf24* (green) and *pdx1* (red) expression in *bmp2a* morphants compared to control morphants at 32 hpf. (B) Ventral view of *fgf10* expression in *bmp2a* morphants compared to control morphants at 36 hpf. White and black dots delineate the LPM; DB, dorsal bud; FB, fin bud.
